# Supplementary material
Source: MDPI journal article supplement (https://www.mdpi.com/2071-1050/13/21/11623)
Supplement: s1 [file s1]

## The influence of farm characteristics and feed compositions on the environmental impact of pig production in Flanders: productivity, energy use and protein choices are key

### Supplementary material

Table S1. Feed ingredients, selected processes and corresponding background databases.

| Ingredient                | Selected process                                                               | Database           |
|---------------------------|--------------------------------------------------------------------------------|--------------------|
| Barley                    | Barley grain, dried, at farm/BE Economic                                       | Agrifootprint v4.0 |
| Oats                      | Oat grain, market mix, at regional storage/BE Economic                         | Agrifootprint v4.0 |
| Wheat                     | Wheat grain, market mix, at regional storage/BE Economic                       | Agrifootprint v4.0 |
| Maize (France)            | Maize, market mix, at regional storage/FR Economic                             | Agrifootprint v4.0 |
|                           | Transport, truck 10-20t, EURO5, 80%LF, default/GLO Economic                    | Agrifootprint v4.0 |
| Wheat flakes              | Maize flour, from dry milling, at plant/NL Economic                            | Agrifootprint v4.0 |
| Wheat pollards            | Wheat bran, from dry milling, at plant/BE Economic                             | Agrifootprint v4.0 |
| Wheat bran                | Wheat bran, from dry milling, at plant/BE Economic                             | Agrifootprint v4.0 |
| Wheat gluten feed         | Wheat gluten feed, from wet milling, at plant/BE Economic                      | Agrifootprint v4.0 |
| Maize pellets             | Maize flour, from dry milling, at plant/NL Economic                            | Agrifootprint v4.0 |
| Maize germ meal           | Maize germ meal extracted, consumption mix, at feed compound plant/NL Economic | Agrifootprint v4.0 |
| DDGS                      | DDGS, dehydrated, from corn, animal feed, at plant/FR U                        | Agribalyse v1.3    |
| Peas (France)             | Pea, at farm/FR Economic                                                       | Agrifootprint v4.0 |
|                           | Transport, truck 10-20t, EURO5, 80%LF, default/GLO Economic                    | Agrifootprint v4.0 |
| Sugar beet pulp (France)  | Sugar beet pulp, wet, from sugar production, at plant/FR Economic              | Agrifootprint v4.0 |
|                           | Transport, truck 10-20t, EURO5, 80%LF, default/GLO Economic                    | Agrifootprint v4.0 |
| Sugar beet pulp (Belarus) | Sugar beet pulp, wet, from sugar production, at plant/PL Economic              | Agrifootprint v4.0 |
|                           | Transport, truck 10-20t, EURO5, 80%LF, default/GLO Economic                    | Agrifootprint v4.0 |
| Sugar cane molasses       | Sugar cane molasses, consumption mix, at feed compound plant/NL Economic       | Agrifootprint v4.0 |
| Sugar beet molasses       | Sugar beet molasses, from sugar production, at plant/BE Economic               | Agrifootprint v4.0 |
| Danex (Brazil)            | Soybean, at farm/BR Economic                                                   | Agrifootprint v4.0 |

|                         |                                                                          |                     |
|-------------------------|--------------------------------------------------------------------------|---------------------|
|                         | Soybean toasting, processing/FR U                                        | Agribalyse v1.3     |
|                         | Soybean extrusion, processing/FR U                                       | Agribalyse v1.3     |
|                         | Transport, sea ship, 80000 DWT, 80%LF, long, default/GLO Economic        | Agrifootprint v4.0  |
| Danex (Canada)          | Soybean, at farm/CA Economic                                             | Agrifootprint v4.0  |
|                         | Soybean toasting, processing/FR U                                        | Agribalyse v1.3     |
|                         | Soybean extrusion, processing/FR U                                       | Agribalyse v1.3     |
|                         | Transport, sea ship, 80000 DWT, 80%LF, middle, default/GLO Economic      | Agrifootprint v4.0  |
| Bosoy (Brazil)          | Soybean, at farm/BR Economic                                             | Agrifootprint v4.0  |
|                         | Soybean toasting, processing/FR U                                        | Agribalyse v1.3     |
|                         | Soybean extrusion, processing/FR U                                       | Agribalyse v1.3     |
|                         | Transport, sea ship, 80000 DWT, 80%LF, long, default/GLO Economic        | Agrifootprint v4.0  |
| Bosoy (Canada)          | Soybean, at farm/CA Economic                                             | Agrifootprint v4.0  |
|                         | Soybean toasting, processing/FR U                                        | Agribalyse v1.3     |
|                         | Soybean extrusion, processing/FR U                                       | Agribalyse v1.3     |
|                         | Transport, sea ship, 80000 DWT, 80%LF, middle, default/GLO Economic      | Agrifootprint v4.0  |
| Soy Hipro (Argentina)   | Soybean meal, from crushing (solvent), at plant/AR Economic              | Agrifootprint, v4.0 |
|                         | Transport, sea ship, 80000 DWT, 80%LF, long, default/GLO Economic        | Agrifootprint, v4.0 |
| Rapeseed meal (Germany) | Rapeseed meal, from crushing (solvent), at plant/DE Economic             | Agrifootprint, v4.0 |
|                         | Transport, truck 10-20t, EURO5, 80%LF, default/GLO Economic              | Agrifootprint, v4.0 |
| Rapeseed meal           | Rapeseed meal, from crushing (solvent), at plant/BE Economic             | Agrifootprint, v4.0 |
| Sunflower seed meal     | Sunflower seed meal, consumption mix, at feed compound plant/NL Economic | Agrifootprint, v4.0 |
| Linseed                 | Linseed, at farm/BE Economic                                             | Agrifootprint, v4.0 |
| Palm kernel expeller    | Palm kernel expeller, from crushing, at plant/MY Economic                | Agrifootprint, v4.0 |
|                         | Transport, sea ship, 80000 DWT, 80%LF, long, default/GLO Economic        | Agrifootprint, v4.0 |
| Oat husk meal           | Oat husk meal, from dry milling, at plant/BE Economic                    | Agrifootprint, v4.0 |
| Soybean hulls           | Soybean hulls, consumption mix, at feed compound plant/NL Economic       | Agrifootprint, v4.0 |
| Mixed animal fat        | Fat from animals, consumption mix, at feed compound plant/NL Economic    | Agrifootprint, v4.0 |
| Soy oil                 | Crude soybean oil, from crushing (solvent), at plant/NL Economic         | Agrifootprint, v4.0 |
| Palm oil                | Palm oil, consumption mix, at feed compound plant/NL Economic            | Agrifootprint, v4.0 |
| Coconut oil             | Crude coconut oil, from Philippines, at feed plant/FR U                  | Agribalyse v1.3     |

|                       |                                                                                                                       |                                        |
|-----------------------|-----------------------------------------------------------------------------------------------------------------------|----------------------------------------|
| DL-Methionine         | DL-Methionine, animal feed, at retailer gate/RER U                                                                    | Agribalyse v1.3                        |
| L-Lysine HCl          | L-Lysine HCl, animal feed, at retailer gate/FR U                                                                      | Agribalyse v1.3                        |
| L-Threonine           | L-Threonine, animal feed, at retailer gate/FR U                                                                       | Agribalyse v1.3                        |
| L-Tryptofaan          | Tryptophane, animal feed, at retailer gate/FR U                                                                       | Agribalyse v1.3                        |
| L-Valine              | Valine, animal feed, at retailer gate/FR U                                                                            | Agribalyse v1.3                        |
| Biscuit meal          | Biscuit meal, animal feed, at retailer gate/FR U                                                                      | Agribalyse v1.3                        |
| Calcium carbonate     | Calcium carbonate (<63µm), production/RER U                                                                           | Agribalyse v1.3                        |
| Monocalcium phosphate | Monocalcium phosphate, animal feed, at retailer gate/FR U                                                             | Agribalyse v1.3                        |
| Salt                  | Sodium chloride, animal feed, at retailer gate/FR U                                                                   | Agribalyse v1.3                        |
| Sodium bicarbonate    | Sodium bicarbonate, animal feed, at retailer gate/RER U                                                               | Agribalyse v1.3                        |
| Bigromin Cazo         | Mixture of minerals, trace elements, vitamins and other feed additives.                                               | Agrifootprint, v4.0<br>Agribalyse v1.3 |
| Porstimin Cazo        | Mixture of minerals, trace elements, vitamins and other feed additives.                                               | Agrifootprint, v4.0<br>Agribalyse v1.3 |
| BrightSow Dracht      | Mixture of minerals, trace elements, vitamins and other feed additives.                                               | Agrifootprint, v4.0<br>Agribalyse v1.3 |
| BrightSow Lacto       | Mixture of minerals, trace elements, vitamins and other feed additives.                                               | Agrifootprint, v4.0<br>Agribalyse v1.3 |
| BrightSpeen           | Mixture of whey powder, potato protein, soybean products, synthetic amino acids, organic acids, minerals and vitamins | Agrifootprint, v4.0<br>Agribalyse v1.3 |
| BrightStart           | Mixture of whey powder, wheat products, potato protein, organic acids, minerals, synthetic amino acids and vitamins   | Agrifootprint, v4.0<br>Agribalyse v1.3 |
| BrightGroeï           | Mixture of whey powder, potato protein, wheat grain, organic acids, minerals, synthetic amino acids and vitamins      | Agrifootprint, v4.0<br>Agribalyse v1.3 |
| Prolacto LP           | Mixture of whey based products, potato protein, vegetable oils, soybean products, organic acids and feed additives.   | Agrifootprint, v4.0<br>Agribalyse v1.3 |

Table S2. Feed conversion efficiencies, number of pigs produced per sow and resulting productivity of the studied pig production farms.

|         | Feed conversion efficiency | Number of pigs produced per sow | Productivity |
|---------|----------------------------|---------------------------------|--------------|
| Farm 1  | 0.32                       | 22.88                           | 7.37         |
| Farm 2  | 0.35                       | 30.47                           | 10.74        |
| Farm 3  | 0.35                       | 30.56                           | 10.82        |
| Farm 4  | 0.34                       | 29.02                           | 9.96         |
| Farm 5  | 0.35                       | 27.42                           | 9.60         |
| Farm 6  | 0.34                       | 27.38                           | 9.39         |
| Farm 7  | 0.38                       | 28.50                           | 10.73        |
| Farm 8  | 0.34                       | 22.33                           | 7.48         |
| Farm 9  | 0.37                       | 32.36                           | 11.95        |
| Farm 10 | 0.31                       | 17.12                           | 5.36         |
| Farm 11 | 0.34                       | 22.42                           | 7.73         |
| Farm 12 | 0.35                       | 20.70                           | 7.23         |
| Farm 13 | 0.37                       | 25.86                           | 9.45         |
| Farm 14 | 0.36                       | 19.67                           | 7.01         |
| Farm 15 | 0.34                       | 24.20                           | 8.20         |
| Farm 16 | 0.35                       | 20.59                           | 7.17         |
| Farm 17 | 0.31                       | 22.30                           | 7.00         |
| Farm 18 | 0.38                       | 31.66                           | 12.04        |
| Farm 19 | 0.35                       | 24.33                           | 8.63         |
| Farm 20 | 0.34                       | 23.67                           | 8.05         |
| Farm 21 | 0.33                       | 29.72                           | 9.89         |
| Farm 22 | 0.38                       | 32.62                           | 12.46        |
| Farm 23 | 0.36                       | 28.04                           | 10.01        |
| Farm 24 | 0.38                       | 29.70                           | 11.32        |
| Farm 25 | 0.31                       | 27.00                           | 8.31         |
| Farm 26 | 0.34                       | 28.17                           | 9.65         |
| Farm 27 | 0.32                       | 24.26                           | 7.69         |
| Farm 28 | 0.33                       | 20.58                           | 6.69         |
| Farm 29 | 0.38                       | 28.43                           | 10.72        |
| Farm 30 | 0.36                       | 26.58                           | 9.68         |
| Farm 31 | 0.37                       | 31.24                           | 11.62        |
| Farm 32 | 0.37                       | 28.01                           | 10.32        |
| Farm 33 | 0.32                       | 19.96                           | 6.38         |
| Farm 34 | 0.31                       | 17.88                           | 5.61         |
| Farm 35 | 0.40                       | 27.41                           | 10.99        |
| Farm 36 | 0.33                       | 23.38                           | 7.76         |
| Farm 37 | 0.34                       | 29.30                           | 10.00        |
| Farm 38 | 0.34                       | 27.22                           | 9.37         |
| Farm 39 | 0.34                       | 23.38                           | 8.04         |
